# Supplementary material for: Transcriptome-Based Identification of ABC Transporters in the Western Tarnished Plant Bug Lygus hesperus
Source: PubMed Central journal article supplement (PMC4234516; doi:10.1371/journal.pone.0113046), 2014-11-17

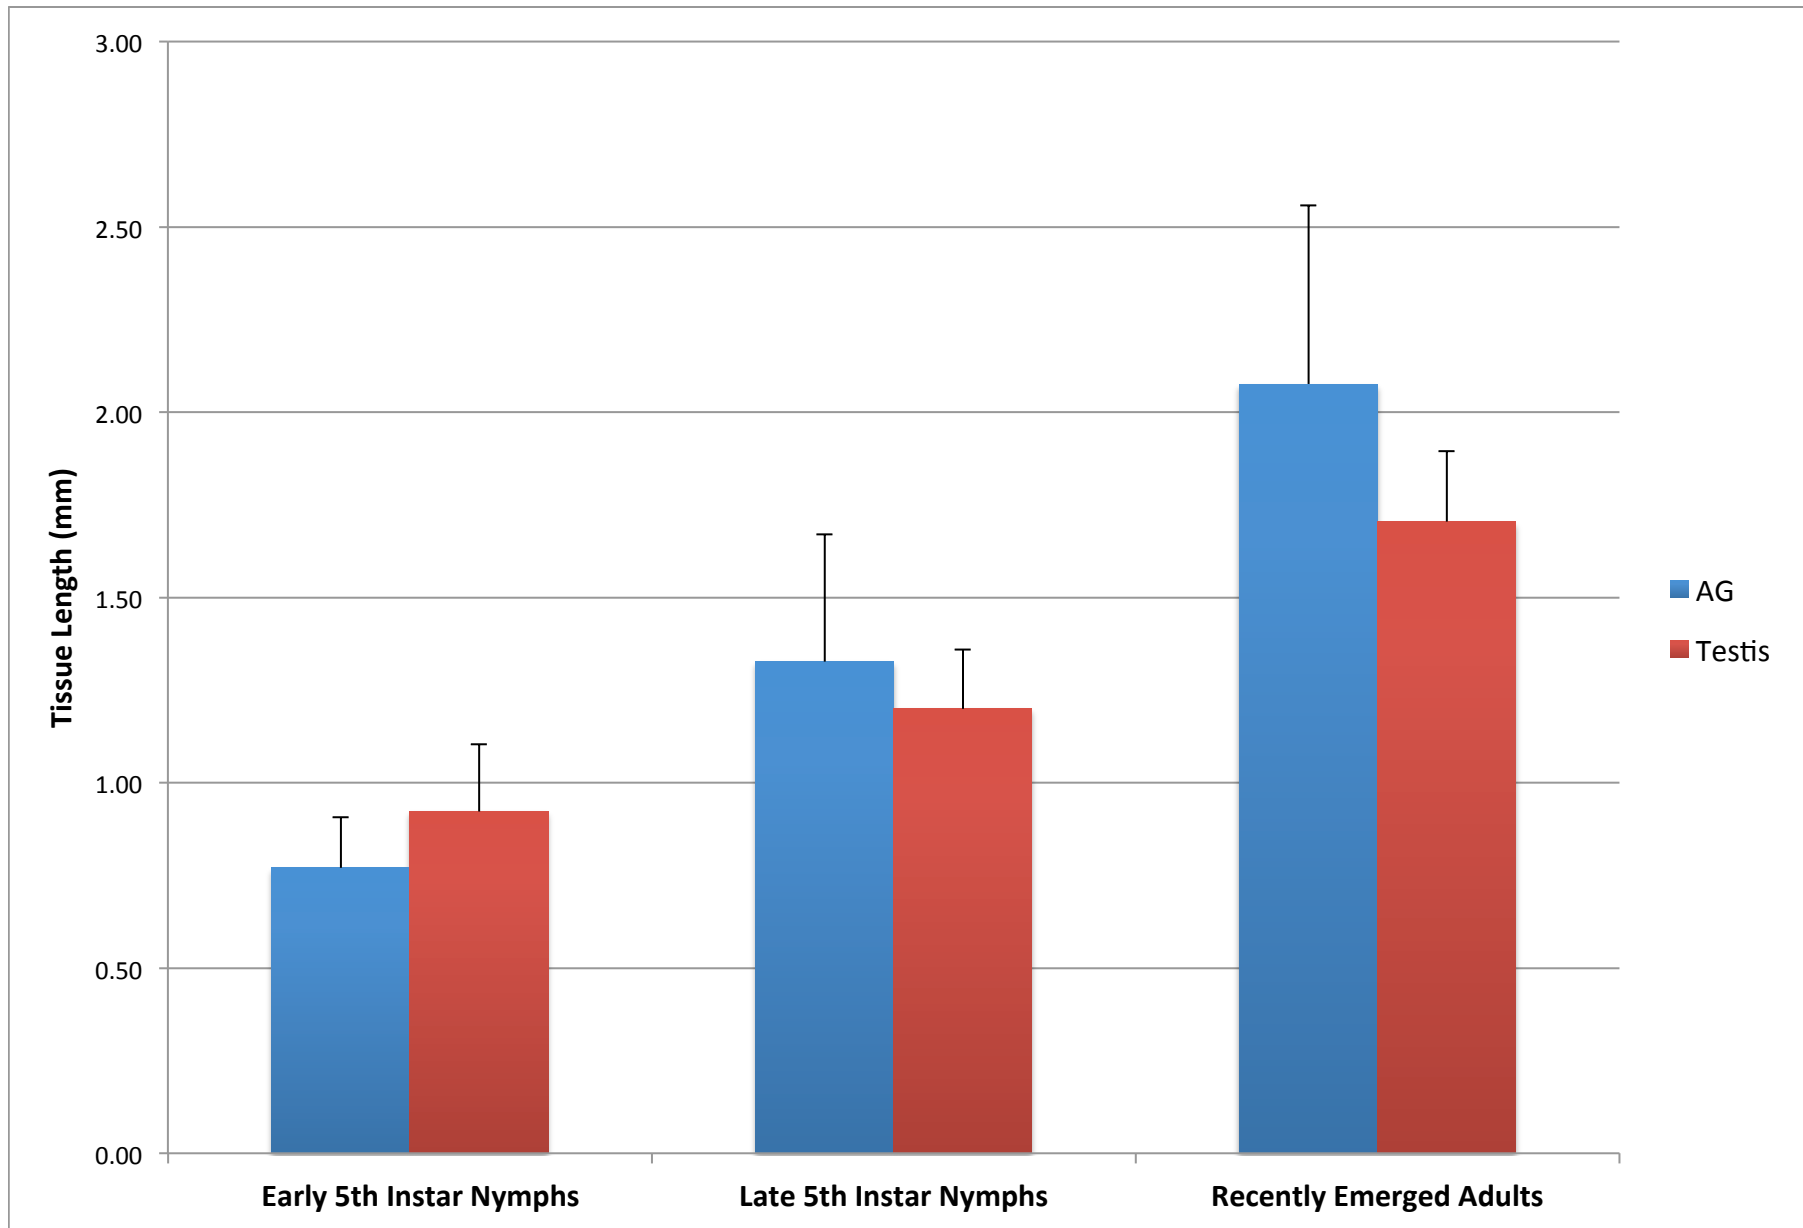

Supplement: pone.0113046.s004.pdf [file pone.0113046.s004.pdf]
